# Supplementary material
Source: PubMed Central journal article supplement (PMC4364279)

## Supplemental Fig.1

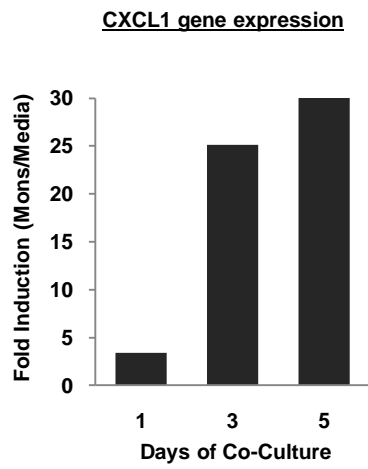

Supplement: NIHMS667978-supplement.pdf [file NIHMS667978-supplement.pdf]
